# Supplementary material for: A Protocol for the Ethical Assessment of Wild Animal–Visitor Interactions (AVIP) Evaluating Animal Welfare, Education, and Conservation Outcomes
Source: MDPI journal article supplement (doi:10.3390/ani9080487), 2019-07-25
Supplement: s1 [file s1]

To be filled in by the operator PreQ operator.....  
Date.....hour ...../ questionnaire n. ....

(Privacy statement here)

1. Write the first three words that come to your mind when you think of a giraffe.

\_\_\_\_\_

2. Why have you decided to join this activity with giraffes?

a) .....

b) .....

c) .....

3. Which are your expectations about this activity?

a) .....

b) .....

c) .....

*Thank you for your contribution!*
