# Supplementary material for: A Protocol for the Ethical Assessment of Wild Animal–Visitor Interactions (AVIP) Evaluating Animal Welfare, Education, and Conservation Outcomes
Source: MDPI journal article supplement (doi:10.3390/ani9080487), 2019-07-25
Supplement: s1 [file s1]

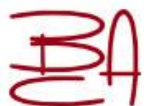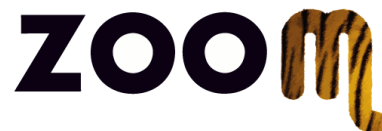

To be filled in by the operator

PostQ

operator .....

(Privacy statement here)

|                                                                 |                                                                                                                                                                                                          |
|-----------------------------------------------------------------|----------------------------------------------------------------------------------------------------------------------------------------------------------------------------------------------------------|
| 1. Age (years old)<br>.....                                     | 3. Educational level<br><input type="checkbox"/> Middle school<br><input type="checkbox"/> High school Graduate<br><input type="checkbox"/> University degree<br><input type="checkbox"/> Other<br>..... |
| 2. Sex<br><input type="checkbox"/> M <input type="checkbox"/> F |                                                                                                                                                                                                          |

4. Write the first three words that come to your mind when you think of a giraffe.

\_\_\_\_\_

5. Would you suggest to a friend to participate in the experience? Mark with an X on a scale from 1 to 10, where 1 means "absolutely not", and 10 "absolutely yes".

1      2      3      4      5      6      7      8      9      10

6. Do you think that the experience with the giraffes added value to your day at Zoom?

- ☐ yes, because.....  
☐ no

7. Are you satisfied with the information provided by the staff before the experience?

- ☐ yes, because .....  
☐ no, because .....

### Some information about your day at ZOOM

8. Which of these talks with biologists/keepers have you already joined today? (*Mark all that apply*)

- ☐ "Conosci le tartarughe"  
☐ "Gli animali del Serengeti"  
☐ Other talks not listed here  
☐ None

9. With whom are you at the zoo today? (Mark all that apply)

- ☐ with friend/s  
☐ with my husband/wife/partner  
☐ with my child/children  
☐ other (*specify*) .....

10. How many times have you already visited ZOOM?

- ☐ first time  
☐ more than once

11. Do you own ZOOM's annual ticket?

- ☐ yes    ☐ no

### Your opinions and impressions

12. Mark with an X the option that best describes how you feel about each of these questions on the "Giraffe feeding" experience.

|                                                                                                                                                       |                                           |
|-------------------------------------------------------------------------------------------------------------------------------------------------------|-------------------------------------------|
| 1a) If during the interaction, you can touch a giraffe, how do you feel?                                                                              | <input type="checkbox"/> Like             |
|                                                                                                                                                       | <input type="checkbox"/> Must             |
|                                                                                                                                                       | <input type="checkbox"/> Do not care      |
|                                                                                                                                                       | <input type="checkbox"/> Can live with it |
|                                                                                                                                                       | <input type="checkbox"/> Dislike          |
| 1b) If during the interaction, you can <b>not</b> touch any giraffe, how do you feel?                                                                 | <input type="checkbox"/> Like             |
|                                                                                                                                                       | <input type="checkbox"/> Must             |
|                                                                                                                                                       | <input type="checkbox"/> Do not care      |
|                                                                                                                                                       | <input type="checkbox"/> Can live with it |
|                                                                                                                                                       | <input type="checkbox"/> Dislike          |
| 2a) If during the interaction, you are told the age, sex and particular characteristics of the giraffe you interact with, how do you feel?            | <input type="checkbox"/> Like             |
|                                                                                                                                                       | <input type="checkbox"/> Must             |
|                                                                                                                                                       | <input type="checkbox"/> Do not care      |
|                                                                                                                                                       | <input type="checkbox"/> Can live with it |
|                                                                                                                                                       | <input type="checkbox"/> Dislike          |
| 2b) If during the interaction, you are <b>not</b> told the age, sex and particular characteristics of the giraffe you interact with, how do you feel? | <input type="checkbox"/> Like             |
|                                                                                                                                                       | <input type="checkbox"/> Must             |
|                                                                                                                                                       | <input type="checkbox"/> Do not care      |
|                                                                                                                                                       | <input type="checkbox"/> Can live with it |
|                                                                                                                                                       | <input type="checkbox"/> Dislike          |

|                                                                                                                                                                      |                                           |
|----------------------------------------------------------------------------------------------------------------------------------------------------------------------|-------------------------------------------|
| 3a) If during the interaction, you are suggested actions you can do to help the conservation of the species you are interacting with, how do you feel?               | <input type="checkbox"/> Like             |
|                                                                                                                                                                      | <input type="checkbox"/> Must             |
|                                                                                                                                                                      | <input type="checkbox"/> Do not care      |
|                                                                                                                                                                      | <input type="checkbox"/> Can live with it |
|                                                                                                                                                                      | <input type="checkbox"/> Dislike          |
| 3b) If during the interaction, you are <b>not</b> suggested any action you can do to help the conservation of the species you are interacting with, how do you feel? | <input type="checkbox"/> Like             |
|                                                                                                                                                                      | <input type="checkbox"/> Must             |
|                                                                                                                                                                      | <input type="checkbox"/> Do not care      |
|                                                                                                                                                                      | <input type="checkbox"/> Can live with it |
|                                                                                                                                                                      | <input type="checkbox"/> Dislike          |
| 4a) If during the interaction, you are suggested behaviours you can do to preserve the animal welfare during the interaction, how do you feel?                       | <input type="checkbox"/> Like             |
|                                                                                                                                                                      | <input type="checkbox"/> Must             |
|                                                                                                                                                                      | <input type="checkbox"/> Do not care      |
|                                                                                                                                                                      | <input type="checkbox"/> Can live with it |
|                                                                                                                                                                      | <input type="checkbox"/> Dislike          |
| 4b) If during the interaction, you are <b>not</b> suggested any behaviour you can implement to preserve the animal welfare during the interaction, how do you feel?  | <input type="checkbox"/> Like             |
|                                                                                                                                                                      | <input type="checkbox"/> Must             |
|                                                                                                                                                                      | <input type="checkbox"/> Do not care      |
|                                                                                                                                                                      | <input type="checkbox"/> Can live with it |
|                                                                                                                                                                      | <input type="checkbox"/> Dislike          |

### Some information about you

13. Did you spend days in contact with nature during your childhood?

- ☐ Yes, during all the year  
☐ Yes, during the summer  
☐ No, rarely  
☐ other (*specify*) .....

14. Do you own pets? (*Mark all that apply*)

- |                                                    |                                                         |
|----------------------------------------------------|---------------------------------------------------------|
| <input type="checkbox"/> no, I do not have any pet | <input type="checkbox"/> yes, a bird/s                  |
| <input type="checkbox"/> yes, a dog/s              | <input type="checkbox"/> yes, a turtle/s                |
| <input type="checkbox"/> yes, a cat/s              | <input type="checkbox"/> yes, a snake/s                 |
| <input type="checkbox"/> yes, a fish/fishes        | <input type="checkbox"/> other ( <i>specify</i> ) ..... |
| <input type="checkbox"/> yes, an hamster/s         |                                                         |

Leave us your email adress if you would like to be involved in future conservation projects.

.....

*Thank you for your contribution!*
