# Supplementary material for: A Protocol for the Ethical Assessment of Wild Animal–Visitor Interactions (AVIP) Evaluating Animal Welfare, Education, and Conservation Outcomes
Source: Animals (Basel). 2019 Jul 25;9(8):487. doi: 10.3390/ani9080487 (PMC6721246; doi:10.3390/ani9080487)
Supplement: Supplementary file 1 [file animals-09-00487-s001.zip]

Archive with 4 entries (4 files):
- supplementary/data_visitor_experience_survey.xlsx
- supplementary/genQ_questionnaire.pdf
- supplementary/postQ_questionnaire.pdf
- supplementary/preQ_questionnaire.pdf
