# Supplementary material for: A Protocol for the Ethical Assessment of Wild Animal–Visitor Interactions (AVIP) Evaluating Animal Welfare, Education, and Conservation Outcomes
Source: Animals (Basel). 2019 Jul 25;9(8):487. doi: 10.3390/ani9080487 (PMC6721246; doi:10.3390/ani9080487)
Supplement: Supplementary file 1 [file animals-09-00487-s001.zip › supplementary/data_visitor_experience_survey.xlsx]

## Sheet: preQ
date	ID	1st giraffe word	2nd giraffe word	3rd giraffe word	1st reason to join	2nd reason to join	3rd reason to join	1st expectation	2nd expectation	3rd expectation
2017-08-26	1	ALTA	COLLO LUNGO	LEGGERA	perche mi piace la giraffa	NA	NA	conoscere la giraffa	NA	NA
2017-08-26	2	MACULATA	ALTA	COLLO LUNGO	amo interagire con gli animali	scoprire le emozioni che proverò	far scoprire al mio bimbo quanto gli animali possono trasmetterti	scoperta di nuove emozioni	nuova esperienza con mio bimbo	prendo la cosa così come viene e sono certa che mi rimarrà per sempre dentro
2017-08-26	3	COLLO	ZAMPE	LINGUA	emozione nuova	NA	NA	interazione con animale non domestico	NA	NA
2017-08-26	4	GIALLA	SAFARI	AFRICA	mi ispirano simpatia	vorrei avvicinarmi a loro	NA	belle sensazioni	NA	NA
2017-08-26	5	COLLO	EVOLUZIONE	AFRICA	per i bambini	NA	NA	che i bambini si divertano	NA	NA
2017-08-26	6	ALTA	COLLO	MACCHIE	perche mi piacciono gli animali	NA	NA	conoscere qualcosa in più sulle giraffe	NA	NA
2017-08-26	7	ALTEZZA	SAVANA	ELEGANZA	è un'esperienza che non capita tutti i giorni	è una cosa molto interessante	NA	emozione	divertimento	NA
2017-08-26	8	LINGUA BLU	GRANDI OCCHI	IMPONENTI	per provare una esperienza diversa dal solito	vivere un'emozione unica	mi piace sentirmi piccola davanti a un'immensità	ricordare sempre l'attività	essere occhi edochi ????	NA
2017-08-26	9	COLLO	GIALLA	MACCHIE	perche molto regali ed affascinanti	curiosità sulla loro vita	vederle da vicino	conoscerle meglio	vederle mangiare	accarezzarle
2017-08-26	10	GIALLO	MACCHIE	COLLO	perche mi incuriosiscono	vederle da vicino	perche conosco poco	di vederle da vicino	di conoscerle di piu	NA
2017-08-26	11	COLLO LUNGO	LINGUA BLU	DARWING	perche mi piacciono le giraffe	vorrei accarezzarle	vorrei darle da mangiare	scoprire cose nuove che la riguardanpo	NA	NA
2017-08-26	12	COLLO	MACCHIE	ALTEZZA	curiosità	interesse	amo gli animali	conoscerli	vederli da vicino	NA
2017-08-26	13	MAESTOSITà	AGILITà	AFRICA	avere un contatto con un animale così spettacolare	potere da vicino un animale così	NA	interazione	imparare qualcosa	NA
2017-08-26	14	AFRICA	BELLA	ALTA	mi è sempre piaciuta l'idea di vederle da vicino	NA	NA	interazione particolare	NA	NA
2017-08-27	15	MAESTOSA	IMPONENTE	CURIOSA	mi piacciono gli animali	sono molto interessato all'interazione uomo/animali	interesse naturalistico	avere un contatto diretto con gli animali	conoscere meglio la giraffa	capire il suo comportamento
2017-08-27	16	BELLISSIMA	MANSUETA	FURBA	perche le giraffe mi sembrano dolcissime	perche sono bellissime	perche vorrei poterla toccare	emozione	divertimento	un po di paura
2017-08-27	17	ELEGANTE	COLLO	MACCHIE	curiosità	interesse	conoscenza	emozione	fare un'esperienza unica	conoscerle di piu
2017-08-27	18	ALTA	COLORATE	A MACCHIE	curiosità	interesse	NA	divertimento	NA	NA
2017-08-27	19	ELEGANZA	ALTEZZA	GAMBE LUNGHE	stare a contatto con gli animali	conoscere le loro abitudini	nuova esperienza	emozione	nuove informazioni sull'animale	NA
2017-08-27	20	COLLO	ALTA	CIGLIA	perche sono curioso siccome non l'ho mai fatto	sono animali affascinanti	NA	spero di avere un'esperienza da poter ricordare	NA	NA
2017-08-27	21	CIGLIA	COLLO LUNGO	MACCHIE	perche mi piacciono gli animali	NA	NA	di toccare una giraffa	NA	NA
2017-08-27	22	COLLO LUNGO	QUIETE	CASA	per cibarle	per avvicinarle	per accarezzarle	esperienza ravvicinata	divertimento	NA
2017-08-27	23	ALTA	INNOCUA	MUTA	curiosità	NA	NA	avvicinarmi a loro	NA	NA
2017-08-27	24	ERBIVORI	ALTEZZA	AFRICA	amore per gli animali	prima esperienza	NA	ricordo	entusiasmo	NA
2017-08-27	25	ALTEZZA	AFRICA	MACCHIE	curiosità	interesse per gli animali	contatto con la natura	divertimento	apprendimento	ricordi
2017-08-28	26	ALTA	GIALLA-MARRONE	DOCILE	curiosità	sogno infanzia	ripiego attività	serenità	emozione	dolcezza
2017-08-28	27	ALTEZZA	PERFEZIONE	DENTI	era l'unica disponibile	è curiosa	NA	un'esperienza nuova	divertimento	NA
2017-08-28	28	COLLO	GIALLO	ALTEZZA	non l'ho fatto apposta	sarà bello	NA	imparare ad interagire con questi animali	tornare con tutte le dita	NA
2017-08-28	29	ALFA	MACCHIE	COLLO	perche mi piacciono le giraffe	NA	NA	che sia meravigliosa	potro scoprire dei comportamenti sulle giraffe	NA
2017-08-28	30	MACCHIE	AFRICA	BELLEZZA	per me e mia figlia	NA	NA	una crescita emotiva	NA	NA
2017-09-05	31	LUNGO	MACCHIA	GRANDE	divertimento	perche mi piacciono	NA	saperne di piu	NA	NA
2017-09-05	32	LUNGA	MACULATA	ELEGANTE	per provare una nuova emozione	per conoscerle da vicino	NA	saranno molto grandi	sarà emozionante	NA
2017-09-05	33	ALTA	BELLISSIMA	RELAX	per far conoscere a mia figlia e che non deve avere paura e che gli animali sono belli	NA	NA	emozione	NA	NA
2017-09-05	34	COLLO LUNGO	GIALLE	NA	per le mie figlie	per dare da mangiare	era bello	che accarezziamo le giraffe	dare da mangiare	vederle
2017-09-05	35	TRAMONTO	CALDO	SAVANA	opportunità di avvicinarmi	avvicinare i miei figli alla conoscenza degli animali	NA	ampliare conoscenza	gioia nei bambini	NA
2017-09-05	36	ALTEZZA	BELLEZZA	ELEGANZA	perche era bella per i bambini	costo accessibile	NA	di far felice i miei bimbi	di fare un'esperienza che altrimenti non potrei fare	NA
2017-09-05	37	DARWIN	COLLO	ALTEZZA	per far vivere un'esperienza unica con i miei figli	NA	NA	Poter vedere da vicino una giraffa e scambiare un'interazione	far divertire i miei figli	NA
2017-09-05	38	BELLE	LUNGHE	COLORATE	perche piacciono gli animali	perche 2 bimbi che piacciono gli animali	NA	una bella esperienza mai fatta prima!	NA	NA
2017-09-05	39	GRANDE	ALTA	NA	per mia figlia	per conoscerle meglio	NA	di imparare di piu come vivono	NA	NA
2017-09-05	40	ALTEZZA	ELEGANZA	COLORI	curiosità	NA	NA	Imparare cose nuove	conservazione	conoscerle di piu
2017-09-14	41	GENTILEZZA	ELEGANZA	CURIOSITà	perche mi interessa il comportamento	sono giganti buoni	simpatia	vedere come reagiscono	godere del contatto	NA
2017-09-14	42	BACIOSA	LINGUA	LUNGA	le adoro	esperienza unica	amore animali	amore	natura	incondizionato
2017-09-17	43	ALTA	MATERNA	LIBERA	per approfondire il mondo deglianimali selvaggi	NA	NA	un ricordo ed un'esperienza unica	NA	NA
2017-09-17	44	MAESTOSA	PACIFICA	NA	è un animale che mi affascina	è un animale che conosco poco	NA	conoscere meglio questa specie	NA	NA
2017-09-17	45	COLLO LUNGO	OCCHI DOLCI	CHIAZZE	per condividere un momento speciale con mio bimbo piccolo	NA	NA	un'esperienza da ricordare	vedere da vicino un animale selvaggio	NA
2017-09-17	46	ALTEZZA	ELASTICITà	CURIOSITà	non ho mai dato da mangiare ad una giraffa	per mettermi alla prova	per interagire con loro	di imparare cose nuove	di vincere le paure	di divertirmi
2017-09-17	47	ALTA	MACCHIE	MARRONE	perche è un'emozione poter vedere da vicino questi animali e poter interagire con loro	NA	NA	di scoprire cosa si prova vicino ad un animale cosi maestoso	NA	NA
2017-09-17	48	ALTA	DOLCE	VELOCE	per interagire	NA	NA	una bella esperienza con la mia famiglia	NA	NA
2017-09-19	49	ALTEZZA	PICCOLE CORNA	MACULATA	animale affascinante	NA	NA	contatto	NA	NA
2017-09-19	50	GIALLO	ALTEZZA	IMPRONTA	perche adoro le giraffe per i loro colori e la loro dolcezza	NA	NA	di potermi avvicinare di più a loro	NA	NA
2017-09-19	51	MAESTOSA	PACIFICA	LENTA	per fare un'esperienza nuova con la giraffa	per nutrirla	per conoscerla meglio	divertimento	nutrimento	passione
2017-09-21	52	COLLO	LINGUA	ALBERO	per far felice mio figlio	NA	NA	risate	belle foto	gioia nello stare realmente a contatto con la natura e con degli animali cosi belli
2017-09-21	53	ALTA	ELEGANTI	AFFAMATA	per farle conoscere a mio figlio	NA	NA	far divertire il bambino	NA	NA
2017-09-21	54	MACCHIE SUL CORPO	ALTEZZA	LUNGHEZZA COLLO	per avere un contatto piu ravvicinato con loro	perche sono gli animali preferiti di mio marito	NA	di poterle vedere piu da vicino	di scoprire e imparare piu cose su di loro	di potergli fare una carezza
2017-09-21	55	MACCHIE	EVOLUZIONE	AFRICA	perche è il mio animale preferito	mi incuriosiscono	vedere dal vivo quello che di solito si vede alla tv	vederle da vicinissimo	accarezzarle	imparare di piu su di loro
2017-09-21	56	STRANA	DINOSAURO	MACCHIE	perche mi piace fare nuove esperienze	perche ho una figlia disabile e volevo farla avvicinare agli animali	NA	che sarà un'esperienza entusiasmante	NA	NA
2017-09-21	57	ALTEZZA	TENEREZZA	ELEGANZA	per interagire con il mondo animale	capire il loro comportamento piu da vicino	NA	una bella esperienza	NA	NA
2017-09-22	58	MACCHIE	ALTEZZA	CORNA	curiosità	per i bimbi	NA	divertimento	dare da mangiare	NA
2017-09-22	59	ALTE	AFRICA	COLLO	poter vedere le giraffe da vicino	perche mi incuriosiscono	NA	imparare cose nuove	divertirmi con la fmiglia	NA
2017-09-23	60	AFRICA	ACE VENTURA	NA	per far vedere le giraffe a mio figlio	per vederle per la prima volta	NA	divertimento	imparare cose nuove	NA
2017-09-23	61	COLOO	MACCHIE	FOGLIA	per interagire	per i miei figli	NA	divertimento	apprendimento	NA
2017-09-23	62	MACCHIA	IMPONENTE	SAVANA	curiosità	NA	NA	conoscere il loro stato di conservazione	emozione	NA
2017-09-23	63	COLLO LUNGO	MACCHIE	CORNA	nuova esperienza	curiosità	NA	imparare qualcosa di nuovo	NA	NA
2017-09-24	64	MACULATA	DOCILE	SILENZIOSA	come termine di paragone	desiderio di vederle da vicinio	desiderio di interazione	poter fare un confronto	poterle vedere	valutare la reazione al contatto con le persone e vedere come mangiano
2017-09-24	65	BELLE	ALTE	MAGRE	per mia figlia	conoscere la loro natura	perche mi affascinano	capire come vivono	felicità	emozione
2017-09-24	66	COLLO	FOGLIA	MACCHIE	curiosità	conoscere cose nuove	perche mi piacciono le giraffe	emozione	ricordo	conoscenza
2017-09-24	67	AFRICA	ALTEZZA	COLLO LUNGO	mi piace molto come animale	scoprire qualcosa di nuovo	NA	che mi	NA	NA

## Sheet: postQ
date	ID	Q.1	Q.2	Q.3	Q.4 - 1st word	Q.4 - 2nd word	Q.4 - 3rd word	Q.5	Q.6	Q.6_because	Q.7	Q.7_because	Q.8_tortoise	Q.8_serengeti	Q.8_other	Q.8_none	Q.9_friends	Q.9_partner	Q.9_children	Q.9_other	Q.10	Q.11	Q.12_1A	Q.12_1B	Q.12_2A	Q.12_2B	Q.12_3A	Q.12_3B	Q.12_4A	Q.12_4B	Q.13	Q.14_none	Q.14_dog	Q.14_cat	Q.14_fish	Q.14_hamster	Q.14_bird	Q.14_tortoise	Q.14_snake	Q.14_other	Q.15
2017-08-26	1	39	F	NA	GRANDE	LUNGA TESTA	LINGUA LUNGA	9	Y	mi sono divertita molto a dare da mangiare alla giraffa	Y	interessante la spiegazione sulla dominanza del gruppo	0	0	0	1	0	1	1	0	A	N	NA	NA	NA	NA	NA	NA	NA	NA	NA		NA	NA	NA	NA	NA	NA	NA	0	NA
2017-08-26	2	37	M	NA	COLLO LUNGO	MOLTO ALTA	LECCA LA MANO PRIMA DI MANGIARE	10	Y	NA	Y	e stato esauriente	1	0	0	0	0	0	1	0	A	N	A	D	A	D	A	E	A	E	A	0	1	1	0	0	0	0	0	0	Y
2017-08-26	3	46	M	C	COLLO	TEST	NA	9	Y	è stato emozionante per me e il bambino	Y	complete e chiare	0	0	1	0	0	1	1	0	B	N	A	E	C	C	A	E	A	E	B	1	0	0	0	0	0	0	0	0	Y
2017-08-26	4	24	F	D	COLLO	LINGUA BLUASTRA	CAROTE E INSALATA	10	Y	non mi ero avvicinata mai cosi tanto	Y	NA	0	0	0	1	0	1	0	1	A	N	A	E	A	E	A	E	A	E	C	0	0	1	0	0	0	0	0	0	Y
2017-08-26	5	51	M	C	COLLO	EVOLUZIONE	LINGUA LUNGA	8	Y	e stato bello toccarle	Y	NA	0	0	1	0	0	0	1	0	B	N	A	E	B	D	A	E	B	D	B	1	0	0	0	0	0	0	0	0	Y
2017-08-26	6	41	F	B	ALTA	COLLO	MACCHIE	10	Y	è emozionante	Y	sono esaurienti	0	1	1	0	0	1	1	1	B	N	A	E	A	E	A	E	A	E	A	0	1	1	1	0	0	0	0	0	Y
2017-08-26	7	24	F	B	MACCHIE	CORNA	MANGIONE	10	Y	e stata un'esperienza unica	Y	era molto precisa e simpatica	0	0	1	0	0	1	0	0	A	N	A	E	A	E	A	E	A	E	C	1	0	0	0	0	0	0	0	0	Y
2017-08-26	8	21	M	A	IMMENSA	ELEGANTE	OCCHIONI	10	Y	è una cosa che può raramente provare	Y	è stata molto chiara	0	0	1	0	0	1	0	0	A	N	A	E	A	E	A	E	A	E	A	1	0	0	0	0	0	0	0	0	Y
2017-08-26	9	28	F	B	GIALLA	COLLO	MACCHIE	10	Y	esperienza unica	Y	spiagazione interessante	0	0	1	0	0	1	0	1	A	N	A	E	B	E	A	E	A	E	B	0	0	1	0	0	0	0	0	CONIGLIO	Y
2017-08-26	10	28	M	B	CAROTA	GIALLO	LINGUA	10	Y	è stato unico	Y	sono state esaustive	0	0	1	0	1	0	0	1	A	N	A	E	A	E	A	E	A	E	C	0	0	0	1	0	1	0	0	0	Y
2017-08-26	11	48	F	B	COLLO LUNGO	LINGUA BLU	DORME UN'ORA AL GIORNO	10	Y	interessante vivere a stretto contatto con loro	Y	la ragazza è molto preparata	0	0	1	0	0	0	1	1	A	N	A	E	A	E	A	E	A	E	A	0	1	1	1	0	0	1	0	GALLINE CONIGLI CAVALLO	Y
2017-08-26	12	22	F	B	COLLO	ALTEZZA	MACCHIA	10	Y	esperienza bella e divertente	Y	spiegato bene	0	0	1	0	0	0	0	1	A	N	A	E	A	E	A	E	A	E	B	0	0	1	0	0	0	0	0	0	Y
2017-08-26	13	35	F	C	ALTEZZA	DOLCEZZA	MAESTOSITà	10	Y	conoscenza dell'animale	Y	è stata esaustiva	0	0	0	1	0	1	0	0	A	N	A	E	A	E	A	E	A	E	A	1	0	0	0	0	0	0	0	0	Y
2017-08-26	14	36	M	B	MAESTOSE	DIVERTENTI	GOLOSE	10	Y	un bel modo di interagire con gli animali	Y	è stata competente	0	0	0	1	0	1	0	0	A	N	A	D	A	D	A	E	A	E	C	1	0	0	0	0	0	0	0	0	Y
2017-08-27	15	41	M	B	IMPONENTE	BELLA	DOLCE	10	Y	perche è un'attività non fattibile…??	Y	NA	1	0	1	0	0	1	1	0	A	N	A	E	A	E	A	E	A	E	A	0	0	0	1	0	0	0	0	0	Y
2017-08-27	16	42	F	C	TENERA	INDIPENDENTE	AFFAMATA	10	Y	è un'emozione	Y	complete e cortesi	0	0	0	1	0	1	1	0	A	N	A	E	A	E	A	E	A	E	A	0	0	0	1	0	0	0	0	0	Y
2017-08-27	17	41	F	C	OCCHI DOLCI	IMPONENTE	ELEGANTE	10	Y	esperienza unica e difficilmente ripetibile	Y	accurate	1	1	1	0	0	1	1	1	B	N	A	E	B	E	A	E	A	E	A	1	0	0	0	0	0	0	0	0	NA
2017-08-27	18	24	F	D	COLLO	COLORE	MACCHIE	10	Y	NA	Y	NA	0	0	0	0	0	0	0	0	A	N	A	D	A	D	A	D	A	D	B	0	1	0	0	0	0	0	0	0	NA
2017-08-27	19	41	M	B	SPLENDIDA	LINGUA RUVIDA	ALTEZZA	10	Y	esperienza mai provata	Y	NA	0	0	0	0	0	1	1	0	A	N	A	D	C	C	A	E	A	E	A	1	0	0	0	0	0	0	0	0	Y
2017-08-27	20	20	F	B	MACCHIE	CIGLIA	LINGUA	10	Y	è stata un'esperienza unica	Y	sono stati esaurienti	0	0	0	1	0	1	0	0	A	N	A	E	A	E	A	E	A	E	A	0	0	1	0	0	0	0	0	0	NA
2017-08-27	21	20	M	B	LINGUA	CALMA	AFFAMATA	9	Y	arrivi a stretto contatto con l'animale	Y	NA	0	0	0	1	0	1	0	0	A	N	A	D	A	D	B	C	A	D	B	1	0	0	0	0	0	0	0	0	NA
2017-08-27	22	37	M	B	ELEGANTE	BELLA	POSATA	10	Y	piu bello interagire con gli animali	Y	NA	0	0	0	1	0	1	0	0	A	N	A	E	A	E	A	E	A	E	C	0	0	1	0	0	0	0	0	0	Y
2017-08-27	23	47	F	B	FAVOLOSA	LENTA	NA	10	Y	interagisci con loro	Y	esaustive	1	0	0	0	0	0	1	0	A	N	A	D	A	E	A	D	B	A	B	0	0	1	0	0	1	0	0	0	NA
2017-08-27	24	23	M	B	SIMPATIA	ALTEZZA	AFRICA	10	Y	si è ancora piu vicino alla natura	Y	sono state esaustive ed interessanti	0	0	1	0	0	1	0	0	A	N	A	D	A	E	A	E	A	E	B	1	0	0	0	0	0	0	0	0	Y
2017-08-27	25	23	F	B	AFRICA	ERBIVORI	SOCIEVOLI	10	Y	mi hanno reso felice	Y	sono state interessanti e alla mano	0	0	1	0	0	1	0	0	A	N	A	E	A	E	A	E	A	E	C	0	1	0	0	0	0	1	0	0	Y
2017-08-28	26	41	F	B	GRANDEZZA	COLORE	ALTEZZA	6	Y	tranquillizzano	Y	molto essaurienti	0	0	0	1	0	1	1	0	A	N	A	E	C	C	A	E	A	E	A	0	0	1	0	0	0	0	0	0	Y
2017-08-28	27	22	M	B	LINGUA	DIVERTENTE	ALTA	10	Y	è stata una nuova esperienza, molto bella	Y	NA	0	0	0	1	0	1	0	0	B	N	A	E	B	D	A	E	A	E	A	0	0	1	0	0	0	0	0	RICCIO	NA
2017-08-28	28	18	F	A	PERFEZIONE	LINGUA	CORNA	10	Y	è stato molto divertente	Y	la guida è stata molto chiara	0	0	1	0	0	1	0	0	B	N	A	E	A	E	A	E	A	E	A	0	0	1	0	0	0	0	0	0	Y
2017-08-28	29	43	M	C	NA	NA	NA	10	Y	dar da mangiare a un'animale è stata una bellissima emozione	Y	molto essaurienti	1	1	1	0	0	0	1	0	A	N	A	D	A	D	A	D	A	E	A	1	0	0	0	0	0	0	0	0	Y
2017-08-28	30	46	M	C	BELLA	BEN TENUTE	OTTIMO POSTO	10	Y	aumenta la mia idea di aiuto al mondo animale	Y	bravissime e disponibili	1	1	1	0	1	1	1	0	A	N	A	B	A	E	A	E	A	E	A	0	0	1	0	0	0	0	0	0	NA
2017-09-05	31	38	F	C	LINGUA NERA	ALTA	MACCHIE	5	Y	NA	Y	NA	0	0	0	1	0	1	0	0	A	N	A	D	A	C	A	A	A	E	A	0	1	0	0	0	0	0	0	0	NA
2017-09-05	32	27	M	B	LUNGA	LINGUA VISCIDA	VIOLA	10	Y	NA	Y	NA	0	0	0	1	0	0	0	1	A	N	A	E	A	E	A	E	A	E	A	1	0	0	0	0	0	0	0	0	NA
2017-09-05	33	48	F	B	DOLCE	GRANDE	BELLISSIME	10	Y	è stato emozionante per me e il bambino	Y	sono state chiare	1	0	1	0	0	1	1	0	A	N	A	E	A	E	A	E	A	E	B	0	1	0	0	0	0	0	0	0	NA
2017-09-05	34	38	M	B	SAM	COLLO LUNGO	ZOOM	10	Y	ho imparato cose nuove	Y	molto bravi	0	1	0	0	0	1	1	0	A	N	A	D	B	E	A	B	A	E	A	0	1	1	1	1	1	1	0	scoiattoli	Y
2017-09-05	35	43	M	C	MORBIDA	SIMPATICA	MITO	10	Y	è un'esperienza	Y	sai come avvicinarti	0	0	0	1	0	1	1	0	A	N	A	E	A	E	A	E	A	E	A	0	0	1	0	0	0	1	0	0	Y
2017-09-05	36	38	F	D	CALMA	ELEGANZA	SIMPATIA	9	Y	è un'esperienza che altrimenti non farei	Y	NA	0	0	0	1	0	1	1	0	A	N	A	D	A	E	A	E	A	E	A	0	0	1	0	0	0	1	0	0	NA
2017-09-05	37	34	F	C	PAZIENTE	INTERAZIONE	MAGNIFICA	10	Y	mi ha fatto conoscere un aspetto del carattere di questo animale che non avrei detto	Y	perche era chiara	0	0	1	0	0	1	1	0	A	N	A	E	B	E	A	D	B	E	B	1	0	0	0	0	0	0	0	0	NA
2017-09-05	38	43	F	B	MERAVIGLIOSE	MAESTOSE	SPETTACOLARI	10	Y	non è da tutti i giorni	Y	preparate	0	1	1	0	0	1	1	0	A	N	A	E	A	E	A	E	A	E	B	0	1	0	0	0	1	1	0	0	Y
2017-09-05	39	35	M	A	SBAVOSA	ALTISSIMA	NA	8	Y	abbiamo imparato qualcosa in piu	Y	competenti	0	0	0	1	0	1	1	0	A	N	A	D	A	D	B	E	B	E	B	0	0	1	0	0	0	0	0	0	Y
2017-09-05	40	29	F	C	ELEGANZA	BELLEZZA	GRANDEZZA	6	N	NA	N	non hanno detto niente di piu	1	1	1	0	1	0	0	0	A	N	D	B	B	E	B	E	A	E	A	0	0	1	0	0	0	0	0	0	NA
2017-09-14	41	57	F	B	SOCIEVOLEZZA	BELLEZZA	LIBERTà	10	Y	insegnamento alla vita	Y	professionalità, conoscenza, passione	0	0	0	1	0	1	1	0	A	N	A	E	A	E	A	E	A	E	A	0	1	1	0	0	0	0	0	0	NA
2017-09-14	42	37	F	B	LINGUA	AMORE	CAROTA	10	Y	tanto amore	Y	esaustive	0	0	0	1	0	0	0	1	A	N	A	A	A	D	A	D	A	E	A	0	0	1	0	0	0	0	0	0	Y
2017-09-17	43	41	M	B	DOLCE	DOMINANTE	SOCIEVOLE	10	Y	NA	Y	non è da tutti dar da mangiare ad un animale di questo periodo	0	0	0	0	0	1	1	0	A	N	A	D	C	C	-	-	-	-	-	-	-	-	-	-	-	-	-	0	NA
2017-09-17	44	27	F	C	MAESTOSA	PACIFICA	NA	10	Y	il contatto da un emozione più forte	Y	sono precise ed esaustive	0	0	1	0	0	1	0	0	B	N	A	D	A	A	A	E	A	E	C	0	1	0	0	0	0	1	0	0	Y
2017-09-17	45	41	F	B	LINGUA LUNGA	TRANQUILLITA	DOLCEZZA	10	Y	contatto ravvicinato entusiasmante	Y	ci da delle regole per il rispetto dell'animale	0	0	1	0	0	1	1	0	A	N	A	E	A	E	A	E	A	E	A	1	0	0	0	0	0	0	0	0	Y
2017-09-17	46	20	F	D	ALTEZZA	RUVIDITà	ELASTICITà	10	Y	ho vinto delle paure	Y	hanno spiegato bene	0	0	1	0	-	-	-	-	-	-	-	-	-	-	-	-	-	-	-	-	-	-	-	-	-	-	-	0	NA
2017-09-17	47	33	M	B	ALTA	MARRONE	RUVIDA	10	Y	è bello entrare in maggior contatto	Y	sono state molto chiare	0	0	1	0	0	1	0	0	A	N	A	D	B	E	A	E	A	E	A	0	1	0	0	0	0	0	0	0	Y
2017-09-17	48	40	F	B	DOLCE	ALTA	FANTASTICA	10	Y	NA	Y	NA	0	0	0	1	0	1	1	0	A	N	A	E	A	E	A	E	A	E	C	0	0	1	1	0	0	0	0	0	NA
2017-09-19	49	34	M	A	ALTEZZA	PICCOLE CORNA	MACULATA	10	Y	esperienza unica	Y	NA	0	0	1	0	0	1	0	0	A	N	A	E	B	E	A	E	A	E	C	0	0	1	0	0	0	0	0	0	NA
2017-09-19	50	22	F	B	LINGUA BLU	ALTEZZA	CAROTA	10	Y	non avrei mai pensato di poter toccare una giraffa	Y	ho posto anche alcune domande a cui mi è stato risposto	0	1	1	0	0	1	0	0	A	N	A	D	A	D	A	E	A	E	B	1	0	0	0	0	0	0	0	0	Y
2017-09-19	51	53	M	B	ALTA	LENTA	MORBIDA	10	Y	abbiamo provato un'esperienza unica	Y	non sapevamo tutte quelle cose	0	0	0	1	0	1	1	0	A	N	A	E	A	E	A	E	A	E	A	0	0	0	1	0	0	0	0	0	Y
2017-09-21	52	31	M	B	COLLO	MACCHIE	BELLEZZA	10	Y	mio figlio era entusiasta	Y	sono bravi e competenti	0	0	0	1	0	1	1	0	A	N	A	D	B	E	A	D	A	D	B	1	0	0	0	0	0	0	0	0	Y
2017-09-21	53	39	F	B	ALTA	ELEGANTE	AFFAMATA	10	Y	è la cosa piu divertente ed interessante	Y	NA	0	0	0	1	0	1	1	0	A	N	A	D	A	D	A	D	A	D	A	0	1	0	1	0	0	1	0	0	NA
2017-09-21	54	22	F	A	MACCHIE	ALTEZZA	COLLO LUNGO	10	Y	siha un contatto vero e proprio con loro	Y	si conoscono meglio gli animali	1	1	1	0	0	1	0	0	B	N	A	D	A	E	A	E	A	E	A	0	0	0	0	0	0	0	0	CONIGLIO	Y
2017-09-21	55	31	M	C	AFRICA	OCCHI GRANDI	LINGUA	10	Y	è stupendo rapportarsi con questi animali	Y	simpatia e competenza	0	1	1	0	0	1	0	0	B	N	A	D	A	D	A	E	A	E	A	0	0	0	0	0	0	0	0	CONIGLIO	Y
2017-09-21	56	49	F	B	MACCHIE	DINOSAURO	STRANA	10	Y	mi sono emozionata	Y	sono state esaustive	0	0	0	1	0	0	1	0	A	N	A	E	A	E	A	E	A	E	A	0	1	0	0	0	0	0	0	0	Y
2017-09-21	57	41	F	C	ELEGANZA	DELICATEZZA	DOLCEZZA	10	Y	è bello conoscere gli animali	Y	forniscono le giuste informazioni	1	0	0	0	0	1	0	0	B	N	A	E	A	E	A	E	A	E	C	0	0	0	0	0	0	0	0	CONIGLIO NANO	Y
2017-09-22	58	46	M	B	ALTEZZA	MAESTOSE	MANGIONE	7	Y	NA	N	NA	1	1	1	0	1	1	0	0	A	N	B	D	B	E	B	E	B	E	A	0	0	0	1	0	0	0	0	0	NA
2017-09-22	59	46	F	B	DIVERTENTI	LINGUA BLU	ALTE	9	Y	NA	Y	NA	1	0	0	0	0	1	1	1	A	N	A	B	A	E	A	D	A	E	A	1	0	0	0	0	0	0	0	0	NA
2017-09-23	60	35	M	B	ALTEZZA	MACCHIE	LINGUA	8	Y	NA	Y	NA	0	1	0	0	0	0	1	0	A	N	A	D	A	D	A	E	A	D	B	0	1	0	0	1	1	0	0	0	NA
2017-09-23	61	42	F	B	APPRENSIONE	DOLCEZZA	NA	7	Y	i miei figli sono stati contenti	Y	sono molto coinvolgenti	0	0	0	1	0	0	1	0	A	N	C	C	A	D	A	D	A	D	B	0	0	1	0	0	0	0	0	0	NA
2017-09-23	62	27	F	C	ALTEZZA	BELLEZZA	NA	8	N	NA	N	non hanno detto niente di piu	0	1	1	0	1	0	0	0	B	N	D	D	B	E	B	E	B	E	A	0	0	1	0	0	0	0	0	0	NA
2017-09-23	63	32	F	D	LINGUA BLU	MACCHIE	ALTE	3	Y	mi sono state fornite nozioni che non conoscevo	N	tropposbrigative nello spiegare e poco dettagliate	0	0	1	0	0	0	0	1	A	N	A	B	A	E	A	D	A	E	A	1	0	0	0	0	0	0	0	0	NA
2017-09-24	64	35	F	C	LINGUA	IMPONENZA	RICURVO	10	Y	c'è un'interazione diretta	Y	sono state date informazioni basilari senza intaccare l'immaginario	0	0	0	1	0	1	0	0	A	N	A	D	B	E	A	E	A	E	B	1	0	0	0	0	0	0	0	0	NA
2017-09-24	65	56	F	C	BELLISSIMA	AFFASCINANTE	SPETTACOLARE	8	Y	ho fatto una nuova esperienza	N	NA	0	1	1	0	0	0	1	0	A	N	A	D	A	E	A	D	A	E	A	0	0	1	0	0	0	0	0	0	NA
2017-09-24	66	35	F	C	DOLCEZZA	INTERAZIONE	BELLEZZA	9	Y	non immaginavo potesse essere cosi emozionante	Y	sono molto competenti	0	0	1	0	1	0	0	0	A	N	A	D	A	D	A	D	A	D	A	0	1	0	0	0	0	0	0	0	NA
2017-09-24	67	21	M	B	MACCHIE	LINGUA LUNGA	CORNA	6	Y	NA	N	NA	0	0	0	1	0	0	1	0	A	N	B	C	B	E	B	E	B	E	B	0	0	1	0	0	0	1	0	0	NA

## Sheet: genQ
date	ID	Q.1	Q.2	Q.3	Q.5 - 1st word	Q.5 - 2nd word	Q.5 - 3rd word	Q.6_giraffe	Q.6_tortoise	Q.6_falcon	Q.6_none	Q.7	Q.8_tortoise	Q.8_serengeti	Q.8_other	Q.8_none	Q.9_friends	Q.9_partner	Q.9_children	Q.9_other	Q.10	Q.11	Q.12	Q.13. NO	Q.13_dog	Q.13_cat	Q.13_fish	Q.13_hamster	Q.13_bird	Q.13_tortoise	Q.13_snake	Q.13_other	Q.13_other	Q.14
2017-08-25	1	30	F	D	MACCHIA	ALTA	GIALLA	1	0	0	0	-	1	1	1	0	0	1	0	1	B	N	C	0	0	0	1	0	0	0	0	0	0	Y
2017-08-25	2	39	F	C	ALTA	MAESTOSA	MACCHIE	0	0	0	1	DOMANI	0	0	1	0	0	1	1	0	A	N	A	0	0	1	0	0	0	0	0	0	0	Y
2017-08-25	3	40	M	C	MODIGLIANI	ALTEZZA	COLLO	0	0	1	0	-	0	0	1	0	0	1	1	0	A	N	B	0	0	1	0	0	0	0	0	0	0	NA
2017-08-25	4	43	F	C	ALTA	MACULATA	BELLA	0	0	0	1	ORARI NON COINCIDEVANO CON IL MIO PASSAGGIO	0	0	1	0	0	1	1	0	A	N	A	1	0	0	0	0	0	0	0	0	0	NA
2017-08-25	5	40	M	B	ELEGANTE	ALTA	PIGRA	0	0	0	1	NON DISPONIBILI	0	0	0	1	0	1	1	0	A	N	A	1	0	0	0	0	0	0	0	0	0	NA
2017-08-25	6	54	F	B	ELEGANTE	SIMPATICA	TENERA	0	0	0	1	MI PIACE DI PIU VEDERLE AL NATURALE	0	0	0	1	0	1	0	0	A	N	A	1	0	0	0	0	0	0	0	0	0	NA
2017-08-25	7	56	M	C	ALTA	FEMMINILE	BELLA	0	0	0	1	HO PARTECIPATO IN ALTRE OCCASIONI	0	0	0	1	0	1	0	0	A	N	B	1	0	0	0	0	0	0	0	0	0	Y
2017-08-25	8	39	F	B	ALTA	TRANQUILLA	AFFASCINANTE	0	0	0	1	PER IL COSTO E BIMBA DI DUE ANNI	1	0	1	0	0	1	1	0	B	N	A	1	0	0	0	0	0	0	0	0	0	Y
2017-08-25	9	34	F	C	ALTA	MACCHIATA	LINGUA LUNGA	0	0	0	1	NON SAPEVO CI FOSSERO	0	0	1	0	0	1	1	0	B	N	A	0	1	0	0	0	0	0	0	0	0	NA
2017-08-25	10	47	F	B	COLLO	ALTA	AFRICA	0	0	0	1	DEDICATO LA GIORNATA AL RELAX IN PISCINA	0	0	1	0	0	1	1	0	A	N	C	0	1	1	0	0	0	0	0	0	0	Y
2017-08-25	11	50	M	B	ALTISSIMA	VELOCE	ELEGANTE	0	0	0	1	ABBIAMO PASSATO LA GIORNATA IN RELAX	0	0	1	0	0	1	1	0	A	N	A	0	1	1	0	0	0	0	0	1	TOPO	Y
2017-08-25	12	48	F	B	GOLOSA	TENERISSIMA	ALTA	1	0	0	0	-	0	0	1	0	0	0	1	1	A	N	B	0	0	0	0	0	1	0	0	0	0	NA
2017-08-25	13	18	F	B	COLLO	CORNA	MACCHIE	1	0	0	0	-	0	0	1	0	0	0	0	1	A	N	C	0	0	0	0	0	1	0	0	0	0	NA
2017-08-26	14	43	F	A	BELLA	ALTA	COLORATA	0	0	0	1	HO GIRATO	0	0	1	0	0	1	0	0	A	N	B	0	1	0	0	0	0	0	0	0	0	Y
2017-08-26	15	25	M	C	COLLO	SAVANA	MACCHIE	1	0	1	0	-	1	1	1	0	1	0	0	0	B	N	A	0	1	0	1	0	1	1	1	0	0	Y
2017-08-26	16	34	M	A	ALTEZZA	PARTICOLARITà	ALTEZZA COLLO	0	0	0	1	NON SAPEVO DOVE SI SVOLGESSE	0	0	0	1	0	1	0	0	B	N	A	0	1	0	0	0	0	0	0	0	0	Y
2017-08-26	17	35	F	A	MAESTOSA	INFINITA	AMOREVOLE	0	0	0	1	NON SONO RIUSCITA A PARTECIPARE	0	0	1	0	0	1	0	0	B	N	A	0	1	0	0	0	0	0	0	0	0	Y
2017-08-26	18	53	M	A	ALTA	AGGRAZIATA	ONDEGGIANTE	0	0	1	0	-	0	0	0	0	0	1	0	0	A	N	B	1	0	0	0	0	0	0	0	0	0	NA
2017-08-26	19	34	F	C	GIALLO	ALTEZZA	TRANQUILLITA	0	0	0	1	DIFFIDENZA CON ANIMALI CHE NON CONOSCO	0	0	0	1	0	1	0	0	A	N	C	1	0	0	0	0	0	0	0	0	0	NA
2017-08-26	20	42	M	C	CALDO	AFRICA	FOGLIA	0	0	0	1	NON MI SONO INFORMATO CIRCA LA POSSIBILITà	0	0	0	1	0	1	0	0	A	N	C	1	0	0	0	0	0	0	0	0	0	NA
2017-08-26	21	37	F	A	ALTA	BELLA	SCURA	0	0	0	1	PERHCE NON HO GUARDATO GLI ORARI	0	0	1	0	0	1	1	0	B	N	A	0	0	0	1	0	0	0	0	0	0	NA
2017-08-26	22	34	M	B	MELMAN	POIS	COLLO LUNGO	0	0	0	1	NA	0	0	0	1	0	1	1	0	A	N	C	1	0	0	0	0	0	0	0	0	0	NA
2017-08-26	23	26	F	B	ALTA	BELLA	MACCHIA	0	0	0	1	PISCINA	0	0	0	1	1	0	0	0	A	N	C	0	1	1	0	0	0	0	0	0	0	NA
2017-08-26	24	26	F	B	COLORI	ALTEZZA	ANIMALE	0	0	0	1	NON MI INTERESSANO E NON HO CONTROLLATO	0	0	0	1	1	0	0	0	A	N	C	0	1	1	0	0	0	0	0	0	0	NA
2017-08-26	25	46	F	B	ALTA	SIMPATICA	MAMMIFERO	1	1	1	0	-	1	1	1	0	1	1	1	0	A	N	A	0	1	0	1	0	0	0	0	1	CONIGLIO	NA
2017-08-26	26	27	M	B	ALTA	COLLO	MACCHIE	0	0	0	1	NON ERO INTERESSATO	0	0	0	1	1	0	0	0	A	N	C	1	0	0	0	0	0	0	0	0	0	NA
2017-08-26	27	23	F	B	ALTA	BELLA	TRANQUILLA	0	0	0	1	PERCHE SONO RIMASTA IN PISCINA, ALLA MATTINA HO VISITATO IL PARCO	0	0	0	1	1	0	0	0	A	N	C	0	1	0	0	0	0	0	0	0	0	Y
2017-08-26	28	53	F	B	MACCHIE	ALTEZZA	AFRICA	0	0	1	0	-	0	0	1	0	0	1	0	0	A	N	C	1	0	0	0	0	0	0	0	0	0	NA
2017-08-27	29	40	M	B	ALTA	MACCHIATA	COLLO LUNGO	0	0	1	0	-	0	1	0	0	0	1	1	0	B	N	C	0	1	0	1	0	1	1	0	0	0	NA
2017-08-27	30	31	M	A	ALTA	UNICA	BELLA	0	0	0	1	PERCHE NON C'ERANO SPETTACOLI	0	0	0	1	0	1	1	0	A	N	A	0	1	0	0	0	0	0	0	0	0	NA
2017-08-28	31	41	M	C	ALTA	BELLA	COLORI	0	0	0	1	PER TEMPO	0	0	1	0	0	1	0	0	A	N	A	1	0	0	0	0	0	0	0	0	0	Y
2017-08-28	32	23	M	B	PUZZA	LUNGA	GIALLA	0	0	0	1	NON è CAPITATO	0	0	1	0	1	0	0	0	B	N	B	0	1	0	0	0	0	0	0	0	0	Y
2017-08-28	33	53	M	B	ALTEZZA	INSTABILITà	NA	0	0	0	1	PERCHE L'HO FATTO ALTRE VOLTE	0	0	0	1	1	0	0	0	B	Y	C	1	0	0	0	0	0	0	0	0	0	NA
2017-08-28	34	46	F	C	LINGUA	COLLO	SAVANA	0	0	0	1	SONO ARRIVATA TARDI	0	0	1	0	0	0	1	1	A	N	B	1	0	0	0	0	0	0	0	0	0	NA
2017-08-28	35	45	M	B	ALTA	LENTA	PENSIEROSA	0	0	0	1	TROPPO CALDO SIAMO ANDATI IN PISCINA	0	0	0	1	0	1	1	0	B	N	A	0	1	0	0	0	0	0	0	0	0	NA
2017-08-28	36	42	F	B	ALTA	MARRONE	BUFFA	0	0	0	1	FACEVA CALDO	0	0	0	1	0	1	1	0	B	N	B	0	1	0	0	0	0	0	0	0	0	NA
2017-08-28	37	33	F	A	ALTA	ELEGANTE	CALMA	0	0	0	1	DUE BIMBI PICCOLI DA GESTIRE	0	0	1	0	0	1	1	0	A	N	C	0	1	0	0	0	0	0	0	0	0	NA
2017-08-28	38	20	F	B	LUNGA	AFRICA	ELEGANTE	0	0	0	1	NON CI HO PENSATO	0	0	1	0	1	0	0	0	B	N	B	0	0	1	0	0	0	0	0	0	0	NA
2017-08-28	39	41	F	C	ALTA	ELEGANTE	DOCILE	0	0	0	1	IL COSTO	0	0	1	0	1	0	1	0	B	N	B	0	1	0	1	0	0	0	0	0	0	Y
2017-08-28	40	47	F	C	ELEGANTE	SINUOSA	ALTA	0	0	0	1	DESIDERAVO PASSARE PIU TEMPO IN PISCINA	0	0	1	0	0	0	1	0	A	N	B	0	0	1	0	0	0	0	0	0	0	Y
2017-09-01	41	40	M	B	ALTA	SPIONA	MAGRA	0	0	0	1	NON MI è VENUTO IN MENTE PER MANCANZA DI TEMPO	0	0	1	0	1	0	0	0	B	N	C	1	0	0	0	0	0	0	0	0	NO	Y
2017-09-01	42	45	F	C	ALTEZZA	COLLO	CUORE	0	0	0	1	TROPPO COSTOSE	0	0	1	0	1	0	1	0	B	N	A	0	0	1	0	0	0	0	0	0	0	NA
2017-09-01	43	18	F	A	ELEGANTE	COLORATA	ALTA	0	0	0	1	NON ERO INTERESSATA	0	0	1	0	0	0	0	1	B	N	B	0	0	1	0	0	0	0	0	0	0	NA
2017-09-01	44	29	F	C	ALTA	ELEGANTE	LENTA	0	0	0	1	PERCHE SIAMO STATI SOLO 1/2 GIORNATA	0	0	1	0	0	1	1	0	B	N	B	0	0	0	0	0	0	0	0	1	CONIGLIO	NA
2017-09-01	45	32	M	C	COLORATA	LUNGA	GOFFA	0	0	0	1	NON SONO RIUSCITO A PASSARE	0	0	1	0	0	1	1	0	A	N	A	0	0	0	0	0	0	0	0	1	CONIGLIO	NA
2017-09-01	46	33	F	C	COLLO	FOGLIA	MACCHIE	0	0	0	1	NON SIAMO ARRIVATI IN TEMPO	0	0	0	1	0	1	1	0	B	Y	C	0	1	1	0	0	0	0	0	0	0	Y
2017-09-02	47	35	F	C	MAESTOSA	ALTA	MANGIONA	0	0	0	1	LE AVEVAMO GIA FATTE	0	0	1	0	0	0	1	1	B	Y	B	1	0	0	0	0	0	0	0	0	0	NA
2017-09-02	48	30	F	D	SIMPATICA	ALTA	ELEGANTE	0	0	1	0	-	0	1	1	0	0	0	0	1	B	N	A	0	1	0	0	0	0	0	0	0	0	Y
2017-09-02	49	29	F	B	ELEGANZA	LINGUA LUNGA	INSALATA	0	0	0	1	PERCHE NON NE ABBIAMO MAI AVUTO OCCASIONE	0	0	1	0	0	1	0	0	B	Y	A	1	0	0	0	0	0	0	0	0	0	Y
2017-09-02	50	33	M	B	ALTA	GIALLA	CORNA	0	0	0	1	L'HO FATTO IN PASSATO	0	0	1	0	0	1	0	0	B	Y	A	1	0	0	0	0	0	0	0	0	0	Y
2017-09-02	51	41	M	C	ALTA	AFRICA	LEGGERA	0	0	0	1	GIA SVOLTE	0	0	0	1	0	0	1	0	B	N	A	1	0	0	0	0	0	0	0	0	0	NA
2017-09-02	52	27	M	A	ALTEZZA	CORNA	AFRICA	0	0	0	1	ANCHE NEL RECINTO NO! POVERE!	0	0	1	0	1	0	0	0	A	N	A	0	0	1	0	0	0	0	0	0	0	NA
2017-09-03	53	58	F	D	ALTA	BELLA	SINUOSA	0	0	0	1	NON SAPEVO, PRIMA VOLTA	0	0	0	1	0	1	1	0	A	N	A	0	0	1	0	0	0	0	0	0	0	Y
2017-09-03	54	67	F	A	ALTA	CARINA	MAESTOSE	0	0	0	1	NON MI PIACE	1	1	0	0	1	0	0	0	A	N	A	0	0	1	0	0	0	0	0	0	0	NA
2017-09-03	55	30	F	C	COLLO	ALTO	MACCHIE	0	0	0	1	CAUSA COSTI AGGIUNTIVI	0	0	1	0	0	1	1	0	B	N	C	1	0	0	0	0	0	0	0	0	0	NA
2017-09-03	56	36	M	B	MAESTOSA	BELLA	AGILE	0	0	0	1	NA	0	0	0	1	0	1	1	0	B	N	B	1	0	0	0	0	0	0	0	0	0	Y
2017-09-03	57	50	M	B	GIGANTE	PEZZATA	BELLA	1	1	0	0	-	1	1	0	0	0	1	0	0	A	N	B	0	0	0	0	0	1	0	0	0	0	Y
2017-09-03	58	62	F	B	ELEGANTE	TRANQUILLA	NA	1	0	0	0	-	0	1	0	0	0	1	0	0	A	N	B	1	0	0	0	0	0	0	0	0	0	NA
2017-09-03	59	32	M	B	LATA	SAVANA	LINGUA LUNGA	0	0	0	1	SONO CON MIA FIGLIA TROPPO PICCOLA	0	0	0	1	0	1	1	0	B	Y	C	0	1	1	0	0	0	0	0	0	0	Y
2017-09-03	60	51	M	B	COLLO	ORECCHIE PICCOLE	ALTEZZA	0	0	0	1	PER MANCANZA DI TEMPO	0	0	1	0	0	1	1	0	B	N	B	1	0	0	0	0	0	0	0	0	0	Y
2017-09-03	61	40	M	C	ELEGANZA	SOPRAVVIVENZA	INTELLIGENZA	0	0	0	1	NON SAPEVO GLI ORARI	0	0	0	1	0	1	1	0	A	N	B	0	0	1	0	0	0	0	0	0	0	NA
2017-09-03	62	49	F	B	COLLO	MACCHIE	ZAMPE	1	0	0	0	-	0	0	1	0	0	1	1	0	B	N	A	1	0	0	0	0	0	0	0	0	0	NA
2017-09-03	63	23	M	B	MACULATA	ALTA	BELLA	0	0	0	1	NON MI INTERESSAVA	1	0	0	0	0	1	0	0	B	N	C	1	0	0	0	0	0	0	0	0	0	Y
2017-09-03	64	22	F	B	ALTA	SIMPATICA	NA	0	0	0	1	PER L'ULTERIORE PREZZO DA PAGARE	0	0	1	0	0	1	0	0	B	N	C	0	0	1	0	0	1	0	0	0	0	NA
2017-09-04	65	38	F	C	ALTA	PULITA	COLLO	0	1	1	0	-	0	1	1	0	0	1	0	0	A	N	B	1	0	0	0	0	0	0	0	0	0	NA
2017-09-04	66	52	F	C	ALTA	BEATA LEI	SIMPATICA	0	0	0	1	NON LO SAPEVO	0	0	1	0	0	0	1	1	A	N	B	0	1	1	0	0	0	1	0	1	CAVALLI	NA
2017-09-04	67	26	F	C	ALTA	BUFFA	GIALLA	0	0	0	1	NON AVEVAMO TEMPO	0	0	1	0	0	0	0	1	B	N	B	0	0	1	0	0	0	1	0	0	0	NA
2017-09-04	68	20	F	B	MAESTOSA	GRANDE	RARA	1	0	0	0	-	0	0	1	0	1	1	0	0	A	N	B	0	1	0	0	0	0	0	0	0	0	NA
2017-09-04	69	37	F	A	IMPONENTE	PACIFICA	LENTA	1	0	0	0	-	0	0	1	0	0	0	1	0	A	N	C	0	1	0	0	0	0	0	0	0	0	NA
2017-09-04	70	33	F	B	MORBIDA	ALTA	BELLA	1	0	0	0	-	0	1	0	0	0	0	0	1	B	N	A	0	1	0	0	0	0	0	0	0	0	NA
2017-09-04	71	36	F	B	ALTA	MAGRA	GIALLA	0	0	0	1	MANCANZA DI TEMPO	0	0	1	0	0	1	1	0	A	N	A	0	0	1	0	0	0	0	0	0	0	NA
2017-09-04	72	35	M	A	ALTA	CURIOSA	STRANA	1	0	0	0	-	1	0	0	0	1	0	0	0	A	N	B	0	1	0	0	0	0	0	0	0	0	NA
2017-09-04	73	36	M	C	ALTA	COLLO	AGILE	0	0	0	1	ME LI SONO PERSI	0	0	1	0	1	1	1	0	A	N	B	0	0	0	1	0	0	0	0	0	0	NA
2017-09-04	74	42	F	B	ALTA	LUNGA	MAGRA	0	0	0	1	NA	0	1	0	0	1	1	1	0	A	N	A	0	0	0	1	0	0	0	0	0	0	Y
2017-09-04	75	45	F	C	ELEGANZA	ALTEZZA	ESILITà	0	0	0	1	COSTO	1	1	1	0	0	1	1	0	B	N	A	0	1	0	1	0	0	0	0	1	FURETTO	NA
2017-09-04	76	46	M	B	COLLO	MACCHIE	CORNA	0	0	0	1	MANCANZA DI TEMPO	1	1	1	0	0	1	1	0	B	N	A	0	1	0	1	0	0	0	0	1	FURETTO	Y
2017-09-04	77	46	F	A	ALTA	RUVIDA	A POIS	0	0	0	1	NON C'ERANO	0	1	1	0	1	0	0	0	B	N	B	1	0	0	0	0	0	0	0	0	0	NA
2017-09-05	78	42	F	D	ALTA	SIMPATICA	BELLA	0	0	0	1	ORARI TROPPO DIFFERENTI	0	0	0	1	0	0	1	0	A	N	A	1	0	0	0	0	0	0	0	0	0	NA
2017-09-05	79	25	F	A	GIGANTE	TRANQUILLA	MERAVIGLIOSA	0	0	0	1	COSTA TROPPO	0	0	1	0	0	0	1	1	B	N	C	1	0	0	0	0	0	0	0	0	0	NA
2017-09-05	80	42	F	A	MAESTOSA	ALTISSIMA	COLORATA	0	0	0	1	ABBIAMO FATTO ALTRO	0	1	1	0	0	0	1	0	B	N	A	0	1	0	0	0	0	1	0	0	0	NA
2017-09-05	81	62	F	A	BELLISSIMA	ELEGANTE	SINUOSA	0	0	0	1	COSTI	0	0	1	0	0	0	0	1	A	N	A	0	1	0	0	0	0	0	0	0	0	NA
2017-09-05	82	26	M	B	MACCHIE	COLLO	SAVANA	1	1	1	0	-	1	1	1	0	0	1	0	0	B	Y	A	0	1	1	1	0	1	1	0	0	0	NA
2017-09-05	83	23	F	B	CIPOLLE	SAVANA	ALBERI	1	0	0	0	-	0	0	1	0	1	0	0	0	A	N	A	1	0	0	0	0	0	0	0	0	0	NA
2017-09-09	84	29	M	C	SIMPATICA	GOFFA	MACULATA	0	0	0	1	NON ERA DI MIO INTERESSE	0	0	1	0	0	1	0	0	A	N	A	0	1	0	0	0	1	0	0	0	0	NA
2017-09-09	85	30	F	B	SIMPATICA	ALTA	GOLOSA	0	0	0	1	PERCHE NON ERO INFORMATA, NE APPROFITTERO LA PROSSIMA VOLTA	0	0	1	0	0	1	0	0	A	N	A	0	0	1	0	0	0	0	0	0	0	NA
2017-09-10	86	30	F	B	ALTA	DINOSAURO	BELLEZZA	1	0	1	0	-	0	0	0	1	0	1	1	0	A	N	A	0	1	0	0	0	0	0	0	0	0	Y
2017-09-10	87	23	F	C	RETE MIRABILE	11KG CUORE	SAVANA	0	0	1	0	-	0	0	1	0	1	0	0	0	B	N	C	0	0	0	0	0	1	0	0	0	0	NA
2017-09-10	88	59	F	B	COLLO	MAESTOSA	SAVANA	0	0	0	1	NON HO FATTO CASO CHE ERA POSSIBILE	0	1	1	0	0	1	0	0	A	N	B	0	0	1	0	0	1	1	0	0	0	NA
2017-09-10	89	63	M	B	IMPONENTE	LUNGA	NA	1	1	1	0	-	0	1	1	0	0	1	0	0	A	N	C	0	0	1	0	0	0	1	0	0	0	NA
2017-09-10	90	38	F	A	OCCHI	BELLA	DOLCE	0	0	0	1	DICENDO LA VERITA, 1 ERA CARA, 2 C'ERANO GIA TROPPE COSE DA FARE	0	0	0	1	1	1	1	0	A	N	B	1	0	0	0	0	0	0	0	0	0	NA
2017-09-10	91	28	M	A	ALTEZZA	LINGUA LUNGA	ELEGANTE	0	0	0	1	PER IL TEMPO	0	0	0	1	0	1	1	0	B	Y	C	0	0	0	0	0	0	1	0	0	0	Y
2017-09-10	92	38	F	A	ALTA	SPENSIERATA	ELEGANTE	0	0	0	1	PER IL PREZZO	0	0	0	1	0	1	1	0	B	Y	A	0	0	0	0	0	0	1	0	0	0	Y
2017-09-10	93	38	F	B	COLLO	LINGUA	MACCHIE	0	0	0	1	NON SAPEVO SI POTESSE FARE	1	0	1	0	0	1	1	0	A	N	B	0	1	0	0	0	0	0	0	0	0	Y
2017-09-10	94	51	M	B	ALTA	ARMONICA	SIMPATICA	0	0	1	0	-	0	0	1	0	0	1	1	0	B	Y	A	1	0	0	0	0	0	0	0	0	0	Y
2017-09-11	95	36	F	C	ACACIA	VERTEBRE	MACCHIE	0	0	0	1	BIMBO TROPPO PICCOLO	0	0	0	1	0	1	1	0	B	N	A	0	1	1	0	0	0	0	0	0	0	Y
2017-09-11	96	41	M	C	GRAZIA	ALTEZZA	VELOCITA	0	0	0	1	NON ERO NEGLI ORARI GIUSTI	0	0	0	1	0	1	1	0	B	N	A	0	1	1	0	0	0	0	0	0	0	Y
2017-09-11	97	40	M	B	ALTA	DOLCE	COLLO	0	0	0	1	-	0	1	1	0	0	1	1	0	A	N	A	1	0	0	0	0	0	0	0	0	0	Y
2017-09-11	98	44	F	B	ALTA	IMPONENTE	SPIRITOSA	0	0	0	1	-	0	0	1	0	0	1	1	0	B	N	B	1	0	0	0	0	0	0	0	0	0	NA
2017-09-11	99	47	M	A	COLLO	AFRICA	COLORE	0	0	0	1	NON NE ERAVAMO A CONOSCENZA	0	0	1	0	0	1	1	0	B	N	D	1	0	0	0	0	0	0	0	0	0	NA
2017-09-11	100	42	F	C	MACCHIE	COLLO	ALTEZZA	0	0	0	1	MANCANZA DI TEMPO	0	1	1	0	0	1	1	0	A	N	A	1	0	0	0	0	0	0	0	0	0	Y
2017-09-14	101	32	F	C	ALTE	DOLCI	TENERE	0	1	0	0	-	0	1	0	0	1	0	0	0	B	N	A	1	0	0	0	0	0	0	0	0	0	Y
2017-09-14	102	33	M	C	ALTEZZA	COLORI	AFRICA	0	0	0	1	PARCO FREQUENTATO CON I MIEI FIGLI PICCOLI, IMPOSSIBILITATO	0	1	1	0	0	1	1	0	A	N	B	0	1	0	0	0	0	0	0	0	0	NA
2017-09-14	103	36	F	B	ALTA	MACULATA	GHIOTTA	0	0	0	1	MANCANZA DI TEMPO	0	1	0	0	0	1	1	0	A	N	B	0	1	1	0	0	0	0	0	0	0	Y
2017-09-15	104	20	F	A	MACCHIE	COLLO	LINGUA	0	0	0	1	PERCHE NON HO AVUTO L'OCCASIONE	0	0	0	1	1	0	0	0	B	N	A	0	1	0	0	0	0	0	0	0	0	NA
2017-09-15	105	33	F	A	ALTA	BELLA	COLLO LUNGO	0	0	0	1	NON HO AVUTO L'OCCASIONE	0	0	1	0	1	0	0	0	B	N	D	1	0	0	0	0	0	0	0	0	0	NA
2017-09-15	106	27	F	C	ALTA	OCCHIONI	DOLCE	0	0	0	1	NON VOLEVO PAGARE PER INTERAZIONI EXTRA	1	1	1	0	0	0	0	1	B	N	B	0	1	1	0	0	0	0	0	0	0	NA
